# Supplementary material for: Hepato-Protective Effects of Delta-Tocotrienol and Alpha-Tocopherol in Patients with Non-Alcoholic Fatty Liver Disease: Regulation of Circulating MicroRNA Expression
Source: MDPI journal article supplement (doi:10.3390/ijms24010079), 2022-12-21
Supplement: s1 [file s1]

Table S1: Sequences of tested miRNAs and spike-in reference used by the manufacturer to design primers for RT-qPCR

| <b>miRNA/gene</b> | <b>miRBase Accession</b> | <b>Mature miRNA sequence</b>  |
|-------------------|--------------------------|-------------------------------|
| hsa-mir-122-5p    | MIMAT0000421             | 5' UGGAGUGUGACAAUGGUGUUUG '3  |
| hsa-mir-21-5p     | MIMAT0000076             | 5' UAGCUUAUCAGACUGAUGUUGA '3  |
| hsa-mir-103a-2-5p | MIMAT0009196             | 5' AGCUUCUUUACAGUGCUGCCUUG '3 |
| hsa-mir-421       | MIMAT0003339             | AUCAACAGACAUUAAUUGGGCGC       |
| hsa-mir-375-5p    | MIMAT0037313             | 5' GCGACGAGCCCCUCGCACAAACC '3 |
| hsa-mir-34a-5p    | MIMAT0000255             | 5' UGGCAGUGUCUUAGCUGGUUGU '3  |
| cel-miR-39-3p     | MIMAT0000010             | 5' UCACCGGGUGUAAAUCAGCUUG '3  |

Table S2: Daily dietary intakes of the study participants at baseline, 24- and 48 weeks

| Parameter            | $\delta$ T3 (n=50)              | $\alpha$ TF (n = 50) | <i>p-value</i>     |
|----------------------|---------------------------------|----------------------|--------------------|
| Energy (kcal/day)    |                                 |                      |                    |
| Baseline             | 2425.6 $\pm$ 340.2 <sup>†</sup> | 2336.9 $\pm$ 347.4   | 0.200 <sup>‡</sup> |
| Week 24              | 2353.6 $\pm$ 311.1              | 2250.4 $\pm$ 309.5   | 0.088 <sup>§</sup> |
| Week 48              | 2313.6 $\pm$ 293.2              | 2209.3 $\pm$ 292.2   | 0.094 <sup>§</sup> |
| <sup>¶</sup> p-value | < 0.001                         | < 0.001              |                    |
| Carbohydrate (g/day) |                                 |                      |                    |
| Baseline             | 333.1 $\pm$ 44.7                | 323.8 $\pm$ 47.1     | 0.320 <sup>‡</sup> |
| Week 24              | 322.3 $\pm$ 41.5                | 310.5 $\pm$ 44.3     | 0.166 <sup>§</sup> |
| Week 48              | 317.1 $\pm$ 40.2                | 304.2 $\pm$ 42.4     | 0.105 <sup>§</sup> |
| <sup>¶</sup> p-value | < 0.001                         | < 0.001              |                    |
| Protein (g/day)      |                                 |                      |                    |
| Baseline             | 97.8 $\pm$ 17.3                 | 92.9 $\pm$ 17.2      | 0.160 <sup>‡</sup> |
| Week 24              | 103.0 $\pm$ 15.6                | 97.4 $\pm$ 14.8      | 0.090 <sup>§</sup> |
| Week 48              | 105.1 $\pm$ 13.7                | 100.2 $\pm$ 12.9     | 0.147 <sup>§</sup> |
| <sup>¶</sup> p-value | < 0.001                         | < 0.001              |                    |
| Total fat (g/day)    |                                 |                      |                    |
| Baseline             | 78.1 $\pm$ 14.0                 | 74.4 $\pm$ 12.7      | 0.182 <sup>‡</sup> |
| Week 24              | 72.5 $\pm$ 13.5                 | 68.8 $\pm$ 12.8      | 0.636 <sup>§</sup> |
| Week 48              | 69.4 $\pm$ 13.1                 | 65.7 $\pm$ 12.7      | 0.601 <sup>§</sup> |
| <sup>¶</sup> p-value | < 0.001                         | < 0.001              |                    |

Abbreviations:  $\delta$ T3:  $\delta$ -tocotrienol;  $\alpha$ TF:  $\alpha$ -tocopherol.

<sup>†</sup> Values are mean  $\pm$  standard deviation (SD)

<sup>‡</sup> Between-groups by independent sample t-test

<sup>§</sup> Between-groups by analysis of covariance adjusted for baseline values

<sup>¶</sup> Within group by repeated measures analysis of variance
